# 1 **Structural colours reflect individual quality: a meta-analysis**

2 Thomas E. White<sup>1,2</sup>

3 <sup>1</sup>School of Life and Environmental Sciences, The University of Sydney, Sydney, Australia 2106

4 <sup>2</sup> Corresponding author.

5 **E-mail:** thomas.white@sydney.edu.au

6 **Keywords:** condition dependent, honest signal, communication, iridescence, sexual selection

7 **Word count (excluding abstract):** 2489

8 **Number of figures:** 1

9 **Number of tables:** 0

10 **Supplementary material:** Supplementary figures and table

## 11 **Abstract**

12 Colourful ornaments often communicate salient information to mates, and theory predicts covariance between  
13 signal expression and individual quality. This has borne out among pigment-based signals, but the potential  
14 for ‘honesty’ in structural colouration is unresolved. Here I synthesised the available evidence to test this  
15 prediction via meta-analysis and found that, overall, the expression of structurally coloured sexual signals  
16 is positively associated with individual quality. The effects varied by measure of quality, however, with  
17 body condition and immune function reliably encoded, but not age nor parasite resistance. The relationship  
18 was consistent for both the chromatic and achromatic components of signals, and was slightly stronger for  
19 iridescent ornaments. These results suggest diverse pathways to the encoding and exchange of information  
20 among structural colours, while highlighting outstanding questions as to the development, visual ecology,  
21 and evolution of this striking adornment.

## 22 Introduction

23 Colour is a ubiquitous channel of communication in nature and is showcased at an extreme in the  
24 service of mate choice [1,2]. Attempts to understand the function of colourful ornaments have often asked  
25 whether and how their expression is tied to individual quality, with empirical tests guided by indicator and  
26 handicap models of sexual selection [3,4]. These models argue that conspicuous ornaments are selectively  
27 favoured because they are difficult and/or costly to produce, and so encode honest information about an  
28 individual's quality to potential mates. A central prediction is that signal expression should be condition-  
29 dependent, and the most robust support to date is found among carotenoid-based colour patterns [5,6]. As  
30 pigments that cannot be synthesised *de novo*, all carotenoids must ultimately be acquired via diet before  
31 being incorporated into signals directly or following bioconversion. This offers ample opportunity for selection  
32 to favour mechanistic links between foraging, metabolic performance, and sexual signal expression, which is  
33 now well established, at least among birds [7,8]. Relative to our knowledge of pigment-based colouration,  
34 however, the potential for structural colours to signal individual quality remains both understudied and  
35 poorly resolved.

36 Unlike pigments, which are selectively absorbent, structural colouration results from the incoherent  
37 scattering, diffraction, and/or constructive interference of light by surface structuring at the nano-scale [9,10].  
38 Three general arguments have been articulated around their potential for honesty in sexual signalling. One  
39 is that if sufficient material is required to produce nano-architectures then it may establish a trade-off with  
40 other physiological needs, and so provide a tangible cost consistent with a handicap explanation [3]. A  
41 non-exclusive alternative builds on the observation that the macro-scale expression of signals relies on the  
42 precision with which the underlying structures are built [11]. If individuals heritably vary in their capacity to  
43 achieve such precision—either directly or via the acquisition of stable developmental conditions—then signals  
44 may serve as an index of underlying genetic quality [4]. Finally, the lack of obvious ecologically relevant  
45 material to trade-off against during signal construction, together with the self-assembly inherent in structural  
46 colours, has motivated arguments against any general expectations for condition dependence *sensu lato* [12].  
47 Though experimental work is able to partition these hypotheses in some contexts [13], most empirical studies  
48 to date have focused on the overarching question of honesty by examining the predicted covariance between  
49 fitness-related traits and signal expression. This has provided valuable insight into the central question, but  
50 diversity in signal designs, measures of 'quality', and taxonomy have presented a challenge for qualitative  
51 synthesis.

52 Here I used phylogenetically controlled meta-analysis and meta-regression to examine whether struc-

53 tural colour signals encode salient information on individual quality. Specifically, I synthesised estimates of  
54 correlations between measures of individual quality and signal expression to test the prediction of condition  
55 dependence, before examining methodological and theoretically derived mediators of effect-size variation  
56 among studies.

## 57 **Methods**

### 58 *Literature search and study selection*

59 I conducted a systematic literature search using *Web of Knowledge* and *Scopus* databases for publi-  
60 cations up to September 2019, using the query ((colour OR color OR pigment) AND signal AND (quality  
61 OR condition OR condition dependent OR condition dependence OR ornament) OR honest\*), as well as  
62 searching the references of included texts. This produced 3482 unique studies, from which 41 were ultimately  
63 suitable for quantitative synthesis following the screening of titles, abstracts, and full texts (see Fig. S1 for  
64 PRISMA statement) using the R package ‘revtools’ v0.4.1 [14]. I included all experimental and observational  
65 studies that quantified the relationship between intersexual structural colour signal expression and any one  
66 of age, body condition (size, size-corrected mass, or growth rate), immune function (oxidative damage, PHA  
67 response, circulating CORT or testosterone) or parasite resistance as a measure of individual quality. I  
68 excluded studies that conflated the structural and pigmentary contributions to signal expression during mea-  
69 surement or manipulation, that directly manipulated colouration or the underlying structures, only studied  
70 sexually immature juveniles, focused exclusively on intrasexual signalling, used human-subjective assessments  
71 of colouration, or which provided insufficient data.

### 72 *Effect size calculation*

73 I used the correlation coefficient, Pearson’s  $r$ , transformed to Fisher’s  $z$  as the effect size describing the  
74 relationship between colour signal expression and measures of individual quality for meta-analysis. These  
75 effects were extracted directly from text or figures, using the R package ‘metadigitise’ v1.0 [15], where  
76 possible ( $n = 100$ ), or was otherwise converted from available test statistics or summary data ( $n = 84$ ).

### 77 *Meta-analyses*

78 I ran both phylogenetic multi-level meta-analytic (intercept-only, MLM) and multi-level meta-  
79 regression (MLMR) models, using the package ‘metafor’ v2.1-0 [16] in R v3.5.2 [17]. Almost all studies  
80 reported multiple effects through the estimation of several colour metrics or multiple measures of individual  
81 quality, so I included both a study- and observation-level random effect in all models. From my MLM

82 model I estimated a meta-analytic mean (i.e., intercept) effect size, which describes the overall support for  
83 the honesty of structural colour signals. I accounted for phylogenetic non-independence between effect sizes  
84 in all models by estimating relationships among species using the Open Tree of Life database [18], accessed  
85 via the R package ‘rotl’ v3.0.10 [19]. Given the resulting tree topology, I estimated a correlation matrix  
86 from branch lengths derived using Grafen’s method [20] assuming node heights raised to the power of 0.5.  
87 Though this does not account for evolutionary divergence, it grants an approximate estimate of relatedness  
88 by accounting for phylogenetic topology (Fig. S2).

89 I then used separate MLMR models to examine the effects of moderators, both theoretical and method-  
90 ological, which may be expected to alter the strength of the signal/quality relationship. These included the  
91 measure of individual quality used—body condition, age, immune function, or parasite resistance (as defined  
92 above)—since ‘quality’ is multivariate (discussed below). There is a suite of metrics available for measuring  
93 colour, though they typically centre on quantifying hue (the unique colour), saturation (spectral purity),  
94 and brightness, or a composite thereof [21]. I therefore coded each as an ‘chromatic’ or ‘achromatic’ measure  
95 in order to separately evaluate which, if any, signal features contain salient information on mate quality.  
96 This dichotomy is supported by physiological and ecological evidence around the partitioning of colour and  
97 luminance information in certain contexts [22–24], as well as the expectation that not all signal features are  
98 equally likely to be subject to condition dependence [25,26]. I also tested the effect of signal iridescence. The  
99 rationale was twofold. For one, all iridescence arises from coherent light-scattering [26]. All things being  
100 equal, coherent light-scattering demands a level of architectural precision beyond that of incoherent scatterers,  
101 and so offers an indirect test of the hypothesised link between the demands of nano-scale precision and signal  
102 honesty. Second, iridescence is an inherently temporal feature of visual communication and this temporal  
103 structure itself may provide an additional or alternate conduit of information to potential mates [13,27,28],  
104 though this possibility remains unexplored directly. I also considered study type, given my inclusion of both  
105 experimental and observational studies, as well as the sex of focal animals. Finally, I coded whether studies  
106 included measurements of non-sexual traits as controls in tests of *heightened* condition-dependence [29] and  
107 tested for an effect on the resulting effect size estimates (see discussion).

#### 108 *Publication bias*

109 I explored evidence for publication bias by visually inspecting funnel plots of effect sizes versus stan-  
110 dard errors (Fig. S3) and using an Egger’s test on an intercept-only MLMA that included the random effects  
111 described above [30].

#### 112 *Data availability*

113 All data and code are available via GitHub (<https://github.com/thomased/metacol>), and will be  
114 persistently archived upon acceptance.

## 115 Results

116 The final dataset comprised 184 effect sizes, across 27 species, from 41 studies [5,13,31–35,35–69].  
117 As predicted, I found a positive overall correlation between individual quality and structural colour signal  
118 expression ( $Z = 0.159$ , 95% CI = 0.087 to 0.232; Fig. 1). These effects sizes were highly heterogeneous ( $I^2$   
119 = 81.24%, 95% CI = 78.31 to 83.78; See table S1 for full set of estimates) as is typical of meta-analytic data  
120 in ecology and evolutionary biology [70]. A small amount of heterogeneity was explained by among-study  
121 effects ( $I^2 = 15.10\%$ , 95% CI = 9.40 to 21.70), and only a very weak phylogenetic signal was evident ( $I^2 =$   
122 1.60%, 95% CI = 0.86 to 2.60).

123 Of the measures of quality considered, body condition ( $Z = 0.191$ , 95% CI = 0.099 to 0.284) and  
124 immune function ( $Z = 0.356$ , 95% CI = 0.126 to 0.587) were reliably positively correlated with structural  
125 colour expression, while age ( $Z = 0.017$ , 95% CI = -0.118 to 0.152) and parasite resistance ( $Z = 0.122$ , 95%  
126 CI = -0.026 to 0.266) were not (Fig. 1). Both the colour ( $Z = 0.154$ , 95% CI = 0.066 to 0.242) and brightness  
127 ( $Z = 0.172$ , 95% CI = 0.071 to 0.273) of signals were similarly informative channels, and iridescent signals  
128 were subject to slightly stronger positive correlations than non-iridescent signals ( $Z = 0.156$ , 95% CI = 0.013  
129 to 0.299). Signal honesty was apparent among males only ( $Z = 0.171$ , 95% CI = 0.093 to 0.247), though the  
130 weak, borderline effect and much smaller sample among females ( $Z = 0.121$ , 95% CI = -0.014 to 0.257,  $n =$   
131 29) suggests a male-bias in the literature similar to that in related fields [71], which may have partly driven  
132 this outcome. Experimental studies tended to report marginally stronger correlations ( $Z = 0.221$ , 95% CI  
133 = 0.109 to 0.334) than observational assays ( $Z = 0.129$ , 95% CI = 0.058 to 0.200), most likely reflecting  
134 slightly exaggerated experimental manipulations of condition relative to natural variation [29]. Finally, the  
135 majority of studies ( $n = 36$ ) did not include measurements of non-sexual control traits, though I found no  
136 clear difference in effect-size estimates between those that did and did not ( $Z = 0.120$ , 95% CI = -0.09 to  
137 0.328).

### 138 *Publication bias*

139 Visual inspection of the funnel plot showed little asymmetry (Fig. S3), as supported by non-significant  
140 Egger's tests ( $t_{180} = -0.2395$ ,  $p = 0.8110$ ), which suggests a minimal influence of missing data on effect size  
141 estimates.

## 142 Discussion

143 Colourful ornaments may be reliable conduits of information on mate quality, though evidence for  
144 the predicted covariance between signal expression and mate quality among structural, as opposed to pig-  
145 mentary, signals is equivocal. Here I found meta-analytic support for this link in the form of a positive  
146 correlation between structural colour expression and individual quality (Fig. 1), consistent with honesty-  
147 based models of sexual signal evolution [3,4]. The strength of the overall correlation, though moderate, was  
148 commensurate with meta-analytic estimates from pigment-based sexual signals [7,8,72], and suggests that  
149 structural colouration may serve a reliable indicator of individual quality.

150 Quality is a multivariate feature of individuals, and this is reflected in the effect-size variation between  
151 measures. Both condition (as narrowly defined above), and proxy measures of immune system integrity were  
152 on-average positively correlated with signal expression. This is consistent with the general expectation of  
153 developmental integration among signalling and fitness-related traits and is supported by experimental work  
154 showing that body mass and immune function are responsive to ecologically salient stressors, with conse-  
155 quences for colour production. Among birds, for example, disease and dietary stress produces abnormalities  
156 in the keratin barbules that contribute to colouration [73–75], while in butterflies the precision arrangement  
157 of wing-scale architectures is disrupted by nutritional and environmental stress during pupal (hence, wing-  
158 structure) development [34,76]. In contrast, neither age nor parasite resistance were reliably informative of  
159 mate quality. These latter measures are often predicated on, or susceptible to, the mechanical degradation  
160 of structures post-development. Thus, the inherently heightened variability of sexual signals combined with  
161 ectoparasite-induced damage and/or accumulated wear with age may compound to render the signals less  
162 accurate predictors on balance [57,77,78]. Curiously, the near inverse relationship was recently identified in a  
163 meta-analysis of carotenoid-based signalling. Weaver et al. [7] examined correlations across similar categories  
164 of quality as those used here but found no consistent relationship between signals and either of body condi-  
165 tion or immune function. Given the fundamental optical and developmental differences between structural  
166 and pigmentary colour production the potential exists for each to signal unique aspects of individual mate  
167 quality, as is suggested by the totality of these results. This has also been directly supported by limited  
168 empirical work [63] and may hold more broadly as an explanation for the often integrated use of structural  
169 and pigmentary mechanisms in sexual colouration.

170 Colour is often assumed to be the central conduit of information exchange given its relative stability  
171 under variable natural illumination [23,25], though my results suggest both the chromatic and achromatic  
172 features of signals are similarly informative (Fig. 1). Furthermore, I identified slightly stronger condition

173 dependence among iridescent, as opposed to non-iridescent, patches. While the underlying architecture  
174 varies across taxa, all iridescent colouration arises from coherent light interference and so demands a level of  
175 architectural regularity and precision beyond that of incoherent scattering [10,26]. Iridescence also introduces  
176 temporal structure to signals since the colour appearance depends on the precise arrangement of signals,  
177 viewers, and light sources. These combined features may render iridescent colouration particularly suitable  
178 as bearers of information [28], as broadly consistent with the results presented here, and so contribute to  
179 the ubiquity of the phenomenon [79,80]. This idea has found some support, for example, via condition-  
180 dependent variation in signal angularity [13], and a predictive relationship between iridescence itself and  
181 mating success [81]. Empirically unravelling the function and perceptual significance of iridescence in the  
182 context of sexual signalling—where the effect is seen at its most extreme—remains an active challenge [27].  
183 More generally, these results affirm the view that the extended spectral and temporal repertoire available  
184 to structural colours may facilitate the exploration of distinct ‘signalling niches’, with tangible evolutionary  
185 consequences [1,52].

186 By integrating the development of signal structure and fitness-related traits, structural colours may  
187 serve as informative signals during mate choice. A holistic understanding, however, awaits progress on  
188 several fronts. Most significant is the inclusion of appropriate non-sexual controls. Given that many traits  
189 will scale with overall condition, the ultimate evidence for handicap models lies in the demonstration of  
190 *heightened* condition-dependence among sexual traits. Though I found no clear difference in effect size  
191 estimates between studies with and without such controls the small sample size was limiting, and moreover  
192 represents a conceptual limitation that remains pervasive [29]. Partitioning indicator and handicap models  
193 of signal evolution, and understanding the nature of direct and/or indirect benefits being signalled, are  
194 key challenges which requires both experimental and quantitative-genetic study across a breadth of taxa  
195 [13]. Finally, signalling ecology should remain front-of-mind as accumulating evidence, consistent with that  
196 presented here, continues to highlight the inherent spatio-temporal complexity of signals and visual systems  
197 [82–84]. This offers exciting opportunities for integrative studies of signal development, production, and  
198 perception, which will fuel a richer view of this pervasive adornment of the natural world.

## 199 Acknowledgments

200 I’m grateful to Daniel Noble and Alistair Senior for advice on meta-analysis, and Elizabeth Mulvenna  
201 and Cormac White for their endless support.



202 **Funding**

203       None to report.

## 204 References

- 205 1. Maia R, Rubenstein DR, Shawkey MD. 2013 Key ornamental innovations facilitate diversification in an  
206 avian radiation. *Proceedings of the National Academy of Sciences* **110**, 10687–10692.
- 207 2. Dalrymple RL, Flores-Moreno H, Kemp DJ, White TE, Laffan SW, Hemmings FA, Hitchcock TD, Moles  
208 AT. 2018 Abiotic and biotic predictors of macroecological patterns in bird and butterfly coloration. *Ecological*  
209 *Monographs* **88**, 204–224.
- 210 3. Zahavi A. 1975 Mate selection—a selection for a handicap. *Journal of Theoretical Biology* **53**, 205–214.
- 211 4. Maynard Smith J, Harper D. 2003 *Animal signals*. Oxford University Press.
- 212 5. Keyser AJ, Hill GE. 1999 Condition-dependent variation in the blue-ultraviolet coloration of a structurally  
213 based plumage ornament. *Proceedings of the Royal Society of London. Series B: Biological Sciences* **266**,  
214 771–777.
- 215 6. Kemp DJ. 2008 Resource-mediated condition dependence in sexually dichromatic butterfly wing coloration.  
216 *Evolution* **62**, 2346–2358.
- 217 7. Weaver RJ, Santos ES, Tucker AM, Wilson AE, Hill GE. 2018 Carotenoid metabolism strengthens the  
218 link between feather coloration and individual quality. *Nature communications* **9**, 73.
- 219 8. Simons MJ, Cohen AA, Verhulst S. 2012 What does carotenoid-dependent coloration tell? Plasma  
220 carotenoid level signals immunocompetence and oxidative stress state in birds—a meta-analysis. *PLoS One*  
221 **7**, e43088.
- 222 9. Vukusic P, Sambles J. 2003 Photonic structures in biology. *Nature* **424**, 852–5.
- 223 10. Johnsen S. 2012 *The optics of life: A biologist's guide to light in nature*. Princeton University Press.
- 224 11. Ghiradella HT, Butler MW. 2009 Many variations on a few themes: A broader look at development of  
225 iridescent scales (and feathers). *Journal of the Royal Society Interface*, rsif-2008.
- 226 12. Prum RO, Dufresne ER, Quinn T, Waters K. 2009 Development of colour-producing  $\beta$ -keratin nanos-  
227 tructures in avian feather barbs. *Journal of the Royal Society Interface* **6**, S253–S265.
- 228 13. Kemp DJ, Rutowski RL. 2007 Condition dependence, quantitative genetics, and the potential signal  
229 content of iridescent ultraviolet butterfly coloration. *Evolution* **61**, 168–183.
- 230 14. Westgate MJ. 2019 Revtools: An r package to support article screening for evidence synthesis. *Research*  
231 *synthesis methods*

- 232 15. Pick JL, Nakagawa S, Noble DW. 2019 Reproducible, flexible and high-throughput data extraction from  
233 primary literature: The metaDigitise r package. *Methods in Ecology and Evolution* **10**, 426–431.
- 234 16. Viechtbauer W. 2010 Conducting meta-analyses in r with the metafor package. *Journal of Statistical*  
235 *Software* **36**, 1–48.
- 236 17. R Core Team. 2018 *R: A language and environment for statistical computing*. Vienna, Austria: R  
237 Foundation for Statistical Computing. See <https://www.R-project.org/>.
- 238 18. Hinchliff CE *et al.* 2015 Synthesis of phylogeny and taxonomy into a comprehensive tree of life. *Pro-*  
239 *ceedings of the National Academy of Sciences* **112**, 12764–12769.
- 240 19. Michonneau F, Brown JW, Winter DJ. 2016 Rotl: An r package to interact with the open tree of life  
241 data. *Methods in Ecology and Evolution* **7**, 1476–1481.
- 242 20. Grafen A. 1989 The phylogenetic regression. *Philosophical Transactions of the Royal Society of London.*  
243 *B, Biological Sciences* **326**, 119–157.
- 244 21. Maia R, White TE. 2018 Comparing colors using visual models. *Behavioral Ecology* **29**, 649–659.
- 245 22. Osorio D, Vorobyev M. 2005 Photoreceptor spectral sensitivities in terrestrial animals: Adaptations for  
246 luminance and colour vision. *Proceedings of the Royal Society B: Biological Sciences* **272**, 1745–1752.
- 247 23. Gegenfurtner KR, Kiper DC. 2003 Color vision. *Annual Review of Neuroscience* **26**.
- 248 24. White TE, Kemp DJ. 2017 Colour polymorphic lures exploit innate preferences for spectral versus  
249 luminance cues in dipteran prey. *BMC evolutionary biology* **17**, 191.
- 250 25. Rubin JM, Richards W. 1982 Color vision and image intensities: When are changes material? *Biological*  
251 *Cybernetics* **45**, 215–226.
- 252 26. Prum RO. 2006 Anatomy, physics, and evolution of structural colors. *Bird coloration* **1**, 295–353.
- 253 27. White TE. 2018 Illuminating the evolution of iridescence. *Trends in Ecology & Evolution* **33**, 374–375.
- 254 28. Rutowski RL, Merry JW, Morehouse NI, Yturralde K, Taylor-Taft L, Gaalema D, Kemp DJ, Papke RS.  
255 2007 Iridescent ultraviolet signal in the orange sulphur butterfly (*colias eurytheme*): Spatial, temporal and  
256 spectral properties. *Biological Journal of the Linnean Society* **90**, 349–364.
- 257 29. Cotton S, Fowler K, Pomiankowski A. 2004 Do sexual ornaments demonstrate heightened condition-  
258 dependent expression as predicted by the handicap hypothesis? *Proceedings of the Royal Society of London.*  
259 *Series B: Biological Sciences* **271**, 771–783.

- 260 30. Egger M, Smith GD, Schneider M, Minder C. 1997 Bias in meta-analysis detected by a simple, graphical  
261 test. *BMJ* **315**, 629–634.
- 262 31. Taylor LA, Clark DL, McGraw KJ. 2011 Condition dependence of male display coloration in a jumping  
263 spider (*habronattus pyrrithrix*). *Behavioral Ecology and Sociobiology* **65**, 1133–1146.
- 264 32. Barry KL, White TE, Rathnayake DN, Fabricant SA, Herberstein ME. 2015 Sexual signals for the  
265 colour-blind: Cryptic female mantids signal quality through brightness. *Functional Ecology* **29**, 531–539.
- 266 33. Peters A, Kurvers R, Roberts ML, Delhey K. 2011 No evidence for general condition-dependence of  
267 structural plumage colour in blue tits: An experiment. *Journal of evolutionary biology* **24**, 976–987.
- 268 34. Kemp DJ. 2008 Resource-mediated condition dependence in sexually dichromatic butterfly wing col-  
269 oration. *Evolution: international journal of organic evolution* **62**, 2346–2358.
- 270 35. Megía-Palma R, Martínez J, Merino S. 2016 A structural colour ornament correlates positively with  
271 parasite load and body condition in an insular lizard species. *The Science of Nature* **103**, 52.
- 272 36. Siefferman L, Hill GE, Dobson FS. 2005 Ornamental plumage coloration and condition are dependent  
273 on age in eastern bluebirds *sialia sialis*. *Journal of Avian Biology* **36**, 428–435.
- 274 37. Perrier C, Lope F de, Møller AP, Ninni P. 2002 Structural coloration and sexual selection in the barn  
275 swallow *hirundo rustica*. *Behavioral Ecology* **13**, 728–736.
- 276 38. Doucet SM. 2002 Structural plumage coloration, male body size, and condition in the blue-black grassquit.  
277 *The Condor* **104**, 30–38.
- 278 39. Smiseth PT, Örnborg J, Andersson S, Amundsen T. 2001 Is male plumage reflectance correlated with  
279 paternal care in bluethroats? *Behavioral Ecology* **12**, 164–170.
- 280 40. Keyser AJ, Hill GE. 2000 Structurally based plumage coloration is an honest signal of quality in male  
281 blue grosbeaks. *Behavioral Ecology* **11**, 202–209.
- 282 41. Schull Q, Dobson FS, Stier A, Robin J-P, Bize P, Viblanc VA. 2016 Beak color dynamically signals  
283 changes in fasting status and parasite loads in king penguins. *Behavioral Ecology*, arw091.
- 284 42. Henderson LJ, Heidinger BJ, Evans NP, Arnold KE. 2013 Ultraviolet crown coloration in female blue  
285 tits predicts reproductive success and baseline corticosterone. *Behavioral Ecology* **24**, 1299–1305.
- 286 43. Zirpoli JA, Black J, Gabriel P. 2013 Parasites and plumage in steller's jays: An experimental field test  
287 of the parasite-mediated handicap hypothesis. *Ethology Ecology & Evolution* **25**, 103–116.

- 288 44. Freeman-Gallant CR, Taff CC, Morin DF, Dunn PO, Whittingham LA, Tsang SM. 2010 Sexual selection,  
289 multiple male ornaments, and age-and condition-dependent signaling in the common yellowthroat. *Evolution:  
290 International Journal of Organic Evolution* **64**, 1007–1017.
- 291 45. Nicolaus M, Le Bohec C, Nolan PM, Gauthier-Clerc M, Le Maho Y, Komdeur J, Jouventin P. 2007  
292 Ornamental colors reveal age in the king penguin. *Polar Biology* **31**, 53–61.
- 293 46. Quinard A, Cézilly F, Motreuil S, Rossi J-M, Biard C. 2017 Reduced sexual dichromatism, mutual  
294 ornamentation, and individual quality in the monogamous zenaida dove *zenaida aurita*. *Journal of Avian  
295 Biology* **48**, 489–501.
- 296 47. Molnár O, Bajer K, Mészáros B, Török J, Herczeg G. 2013 Negative correlation between nuptial throat  
297 colour and blood parasite load in male european green lizards supports the hamilton–zuk hypothesis. *Natur-  
298 wissenschaften* **100**, 551–558.
- 299 48. Grindstaff JL, Lovern MB, Burtka JL, Hallmark-Sharber A. 2012 Structural coloration signals con-  
300 dition, parental investment, and circulating hormone levels in eastern bluebirds (*sialia sialis*). *Journal of  
301 Comparative Physiology A* **198**, 625–637.
- 302 49. Bajer K, Molnar O, Török J, Herczeg G. 2012 Temperature, but not available energy, affects the  
303 expression of a sexually selected ultraviolet (uv) colour trait in male european green lizards. *PLoS One* **7**,  
304 e34359.
- 305 50. Roberts ML, Ras E, Peters A. 2009 Testosterone increases uv reflectance of sexually selected crown  
306 plumage in male blue tits. *Behavioral Ecology* **20**, 535–541.
- 307 51. Silva N, Avilés JM, Danchin E, Parejo D. 2008 Informative content of multiple plumage-coloured traits  
308 in female and male european rollers. *Behavioral Ecology and Sociobiology* **62**, 1969.
- 309 52. Bitton P-P, Dawson RD. 2008 Age-related differences in plumage characteristics of male tree swallows  
310 *tachycineta bicolor*: Hue and brightness signal different aspects of individual quality. *Journal of Avian  
311 Biology* **39**, 446–452.
- 312 53. Balenger SL, Scott Johnson L, Brubaker JL, Ostlind E. 2007 Parental effort in relation to structural  
313 plumage coloration in the mountain bluebird (*sialia currucoides*). *Ethology* **113**, 838–846.
- 314 54. Siitari H, Alatalo RV, Halme P, Buchanan KL, Kilpimaa J. 2007 Color signals in the black grouse (*tetrao  
315 tetrix*): Signal properties and their condition dependency. *The American Naturalist* **169**, S81–S92.
- 316 55. Mougeot F, Arroyo BE. 2006 Ultraviolet reflectance by the cere of raptors. *Biology Letters* **2**, 173–176.

- 317 56. Kemp DJ, Vukusic P, Rutowski R. 2006 Stress-mediated covariance between nano-structural architecture  
318 and ultraviolet butterfly coloration. *Functional Ecology* **20**, 282–289.
- 319 57. Kemp DJ. 2006 Heightened phenotypic variation and age-based fading of ultraviolet butterfly wing  
320 coloration. *Evolutionary Ecology Research* **8**, 515–527.
- 321 58. Peters A, Delhey K, Goymann W, Kempenaers B. 2006 Age-dependent association between testosterone  
322 and crown uv coloration in male blue tits (*parus caeruleus*). *Behavioral Ecology and Sociobiology* **59**, 666–673.
- 323 59. Mougeot F, Redpath SM, Leckie F. 2005 Ultra-violet reflectance of male and female red grouse, *lagopus*  
324 *lagopus scoticus*, sexual ornaments reflect nematode parasite intensity. *Journal of Avian Biology* **36**, 203–209.
- 325 60. Hill GE, Doucet SM, Buchholz R. 2005 The effect of coccidial infection on iridescent plumage coloration  
326 in wild turkeys. *Animal Behaviour* **69**, 387–394.
- 327 61. Doucet SM, Montgomerie R. 2003 Multiple sexual ornaments in satin bowerbirds: Ultraviolet plumage  
328 and bowers signal different aspects of male quality. *Behavioral Ecology* **14**, 503–509.
- 329 62. Hahn S, Peter H-U. 2003 Sex and age dependency of wing patch size in brown skuas. *Emu* **103**, 37–41.
- 330 63. McGraw KJ, Mackillop EA, Dale J, Hauber ME. 2002 Different colors reveal different information: How  
331 nutritional stress affects the expression of melanin-and structurally based ornamental plumage. *Journal of*  
332 *Experimental Biology* **205**, 3747–3755.
- 333 64. Molnár O, Bajér K, Török J, Herczeg G. 2012 Individual quality and nuptial throat colour in male e  
334 uropean green lizards. *Journal of Zoology* **287**, 233–239.
- 335 65. Griggio M, Zanollo V, Hoi H. 2010 UV plumage color is an honest signal of quality in male budgerigars.  
336 *Ecological Research* **25**, 77–82.
- 337 66. Viblanc VA *et al.* 2016 Mutually honest? Physiological ‘qualities’ signalled by colour ornaments in  
338 monomorphic king penguins. *Biological Journal of the Linnean Society* **118**, 200–214.
- 339 67. Lim ML, Li D. 2006 Effects of age and feeding history on structure-based uv ornaments of a jumping  
340 spider (araneae: Salticidae). *Proceedings of the Royal Society B: Biological Sciences* **274**, 569–575.
- 341 68. Bitton P-P, Dawson RD, Ochs CL. 2008 Plumage characteristics, reproductive investment and assortative  
342 mating in tree swallows *tachycineta bicolor*. *Behavioral Ecology and Sociobiology* **62**, 1543–1550.
- 343 69. Beck ML, Hopkins WA, Hawley DM. 2015 Relationships among plumage coloration, blood selenium  
344 concentrations and immune responses of adult and nestling tree swallows. *Journal of Experimental Biology*  
345 **218**, 3415–3424.

- 346 70. Senior AM, Grueber CE, Kamiya T, Lagisz M, O'dwyer K, Santos ES, Nakagawa S. 2016 Heterogeneity  
347 in ecological and evolutionary meta-analyses: Its magnitude and implications. *Ecology* **97**, 3293–3299.
- 348 71. Ah-King M, Barron AB, Herberstein ME. 2014 Genital evolution: Why are females still understudied?  
349 *PLoS Biology* **12**, e1001851.
- 350 72. Griffith SC, Parker TH, Olson VA. 2006 Melanin- versus carotenoid-based sexual signals: Is the difference  
351 really so black and red? *Animal Behaviour* **71**, 749–763. (doi:10.1016/j.anbehav.2005.07.016)
- 352 73. Murphy ME, King JR, Lu J. 1988 Malnutrition during the postnuptial molt of white-crowned sparrows:  
353 Feather growth and quality. *Canadian Journal of Zoology* **66**, 1403–1413.
- 354 74. Negro Juan Jose, Bildstein KL, Bird DM. 1994 Effects of food deprivation and handling stress on  
355 fault-bar formation in nestling american kestrels (*Falco sparverius*). *ARDEA* **82**, 263–267.
- 356 75. Shawkey MD, Estes AM, Siefferman LM, Hill GE. 2003 Nanostructure predicts intraspecific variation  
357 in ultraviolet-blue plumage colour. *Proc R Soc B* **270**, 1455–1460. (doi:10.1098/rspb.2003.2390)
- 358 76. Kemp DJ, Vukusic P, Rutowski RL. 2006 Stress-mediated covariance between nano-structural architec-  
359 ture and ultraviolet butterfly coloration. *Functional Ecology* **20**, 282–289. (doi:10.1111/j.1365-2435.01100.x)
- 360 77. Cotton S, Fowler K, Pomiankowski A. 2004 Condition dependence of sexual ornament size and variation  
361 in the stalk-eyed fly *Cyrtodiopsis dalmanni* (Diptera: Diopsidae). *Evolution* **58**, 1038–1046.
- 362 78. Pomiankowski A, Møller AP. 1995 A resolution of the lek paradox. *Proceedings of the Royal Society of*  
363 *London. Series B: Biological Sciences* **260**, 21–29.
- 364 79. Seago AE, Brady P, Vigneron J-P, Schultz TD. 2009 Gold bugs and beyond: A review of iridescence and  
365 structural colour mechanisms in beetles (Coleoptera). *Journal of the Royal Society Interface* **6**, S165–S184.  
366 (doi:10.1098/rsif.2008.0354.focus)
- 367 80. Mouchet SR, Vukusic P. 2018 Structural colours in lepidopteran scales. In *Advances in insect physiology*,  
368 pp. 1–53. Elsevier.
- 369 81. Loyau A, Gomez D, Moureau BT, They M, Hart NS, Saint Jalme M, Bennett ATD, Sorci G. 2007  
370 Iridescent structurally based coloration of eyespots correlates with mating success in the peacock. *Behavioral*  
371 *Ecology* **18**, 1123–1131. (doi:10.1093/beheco/arm088)
- 372 82. Hogan BG, Stoddard MC. 2018 Synchronization of speed, sound and iridescent color in a hummingbird  
373 aerial courtship dive. *Nature Communications* **9**.

- 374 83. White TE, Zeil J, Kemp DJ. 2015 Signal design and courtship presentation coincide for highly biased  
375 delivery of an iridescent butterfly mating signal. *Evolution* **69**, 14–25.
- 376 84. Foster DH, Amano K, Nascimento SM. 2001 How temporal cues can aid colour constancy. *Color Research*  
377 *& Application* **26**, S180–S185.



378 **Figures**

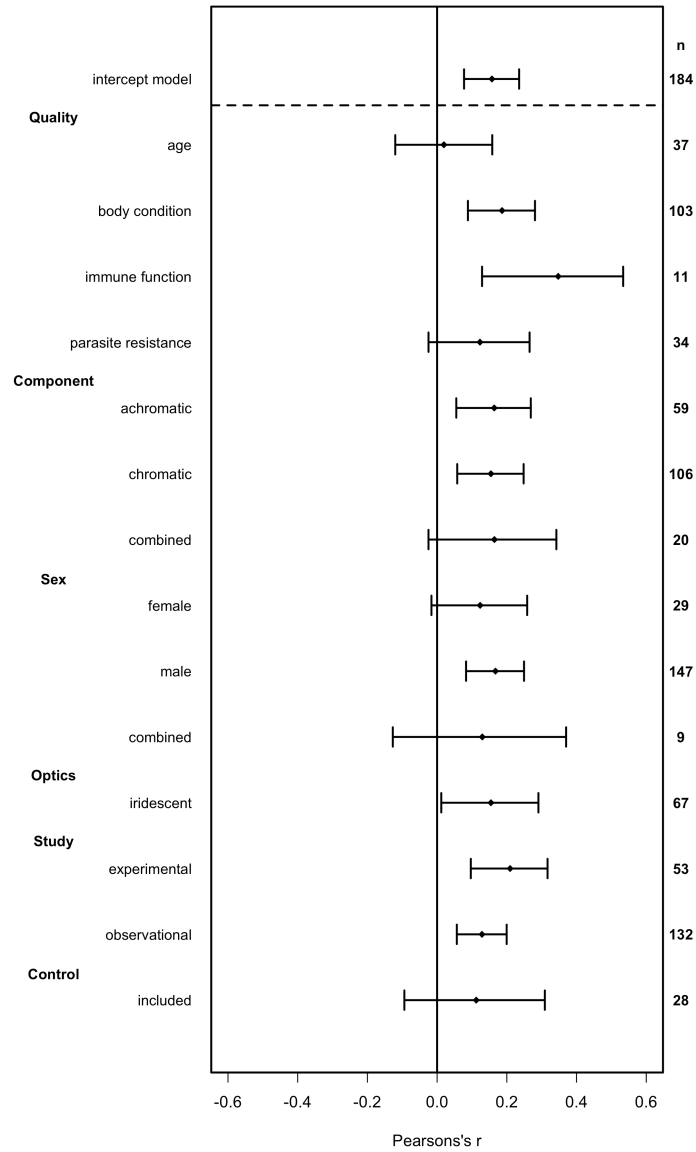

Figure 1: Forest plot of the mediators of the correlation between structural colour signal expression and individual quality. Shown are Pearson's correlations back transformed from Fisher's z, with 95% confidence intervals about the mean. Sample sizes are displayed on the right.
